# Supplementary figures and images for: Optimization of lentiviral vector production for scale-up in fixed-bed bioreactor
Source: PubMed Central journal article supplement — Gene Ther. 2018 Jan 18;25(1):39–46. doi: 10.1038/gt.2017.91 (PMC5817386; doi:10.1038/gt.2017.91), 2018-01-18

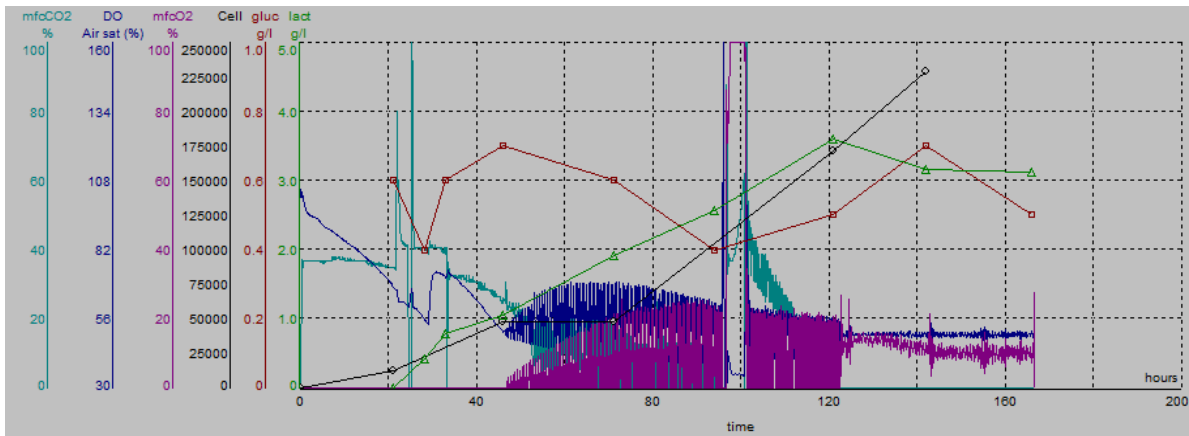

Supplementary figure 1. Valkama et al.

Supplement: gt201791x1.pdf [file gt201791x1.pdf]

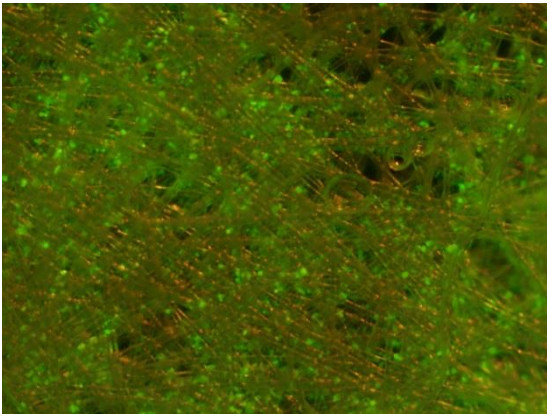

Supplementary figure 2. Valkama et al.

Supplement: gt201791x2.pdf [file gt201791x2.pdf]
